# Supplementary material for: Fatty Acid and Amino Acid Profiles of Seven Edible Insects: Focus on Lipid Class Composition and Protein Conversion Factors
Source: MDPI journal article supplement (doi:10.3390/foods12224090), 2023-11-10
Supplement: s1 [file s1]

**Supplementary Table S1.** Proximate composition of edible insects, expressed as g / 100 g DM (mean  $\pm$  SEM), except for moisture, which is expressed as g / 100 g insect.

|                       | ACD                           | ALD                            | BD                            | GM                            | LM                             | TM                             | ZM                            |
|-----------------------|-------------------------------|--------------------------------|-------------------------------|-------------------------------|--------------------------------|--------------------------------|-------------------------------|
| <b>Total lipids</b>   | 21.32 $\pm$ 0.36 <sup>b</sup> | 21.82 $\pm$ 0.30 <sup>b</sup>  | 13.96 $\pm$ 0.45 <sup>a</sup> | 53.63 $\pm$ 0.80 <sup>d</sup> | 32.28 $\pm$ 0.43 <sup>c</sup>  | 22.61 $\pm$ 0.64 <sup>b</sup>  | 33.97 $\pm$ 0.82 <sup>c</sup> |
| <i>Neutral lipids</i> | 9.94 $\pm$ 0.33 <sup>ab</sup> | 10.32 $\pm$ 0.39 <sup>ab</sup> | 7.91 $\pm$ 0.53 <sup>a</sup>  | 46.22 $\pm$ 0.88 <sup>d</sup> | 24.44 $\pm$ 0.55 <sup>c</sup>  | 10.79 $\pm$ 0.68 <sup>b</sup>  | 22.18 $\pm$ 0.98 <sup>c</sup> |
| <i>Glycolipids</i>    | 5.85 $\pm$ 0.18 <sup>b</sup>  | 8.32 $\pm$ 0.54 <sup>c</sup>   | 2.64 $\pm$ 0.22 <sup>a</sup>  | 5.97 $\pm$ 0.32 <sup>b</sup>  | 3.08 $\pm$ 0.31 <sup>a</sup>   | 9.58 $\pm$ 0.54 <sup>cd</sup>  | 10.61 $\pm$ 0.78 <sup>d</sup> |
| <i>Phospholipids</i>  | 5.54 $\pm$ 0.29 <sup>c</sup>  | 3.18 $\pm$ 0.41 <sup>b</sup>   | 3.40 $\pm$ 0.39 <sup>b</sup>  | 1.43 $\pm$ 0.12 <sup>a</sup>  | 4.76 $\pm$ 0.22 <sup>c</sup>   | 2.23 $\pm$ 0.28 <sup>ab</sup>  | 1.17 $\pm$ 0.28 <sup>a</sup>  |
| <b>True protein</b>   | 39.37 $\pm$ 0.10 <sup>c</sup> | 55.74 $\pm$ 0.21 <sup>c</sup>  | 61.49 $\pm$ 0.27 <sup>f</sup> | 28.69 $\pm$ 0.53 <sup>a</sup> | 44.23 $\pm$ 0.59 <sup>d</sup>  | 44.68 $\pm$ 0.74 <sup>d</sup>  | 34.57 $\pm$ 0.20 <sup>b</sup> |
| <b>Moisture</b>       | 68.51 $\pm$ 0.13 <sup>d</sup> | 72.5 $\pm$ 0.06 <sup>c</sup>   | 64.10 $\pm$ 0.72 <sup>c</sup> | 56.21 $\pm$ 1.77 <sup>a</sup> | 62.45 $\pm$ 0.15 <sup>bc</sup> | 63.00 $\pm$ 0.17 <sup>bc</sup> | 61.37 $\pm$ 0.06 <sup>b</sup> |

<sup>a-d</sup> Mean values in the same row not followed by a common letter differ significantly ( $p < 0.001$ ). ACD: *A. domesticus*; ALD: *A. diaperinus*; BD: *B. dubia*; GM: *G. mellonella*; LM: *L. migratoria*; TM: *T. molitor*; ZM: *Z. morio*.
